# Supplementary material for: Antihypertensive activity of a quinoline appended chalcone derivative and its site specific binding interaction with a relevant target carrier protein
Source: Royal Society of Chemistry journal article supplement (doi:10.1039/c5ra08778c), 2015-01-01

***Electronic Supplementary Information for RSC Advances  
article***

**Antihypertensive Activity of a Quinoline Appended  
Chalcone Derivative and its Site Specific Binding  
Interaction with Relevant Target Carrier Protein**

*Himank Kumar<sup>a</sup>, Vinod Devaraji<sup>b</sup>, Ritika Joshi<sup>a</sup>, Manojkumar Jadhao<sup>a</sup>, Piyush Ahirkar<sup>a</sup>  
Prasath R<sup>c</sup>, P. Bhavana<sup>c</sup> and Sujit Kumar Ghosh<sup>a\*</sup>*

<sup>a</sup>Department of Chemistry, Visvesvaraya National Institute of Technology, Nagpur,  
Maharashtra, 440010, India

<sup>b</sup>Department of Pharmaceutical Chemistry, College of Pharmacy, Madras Medical College,  
Chennai, 600003, India

<sup>c</sup>Department of Chemistry, BITS-Pilani, K.K. Birla Goa Campus, Zuarinagar, Goa, 403726,  
India

**Corresponding Author full address details:**

Sujit Kumar Ghosh\*, Department of Chemistry, Visvesvaraya National Institute of  
Technology, Nagpur, Maharashtra, 440010, India, e-mail: [sujitju@yahoo.co.in](mailto:sujitju@yahoo.co.in),  
[skghosh@chm.vnit.ac.in](mailto:skghosh@chm.vnit.ac.in)

## Contents

S1- Time resolved fluorescence decay of ADMQ with increasing ACE. ( $\lambda_{\text{ex}} = 407 \text{ nm}$ ,  $\lambda_{\text{em}} = 550 \text{ nm}$ ) at 298 K.  $[\text{ADMQ}] = 9.871 \times 10^{-6} \text{ mol dm}^{-3}$

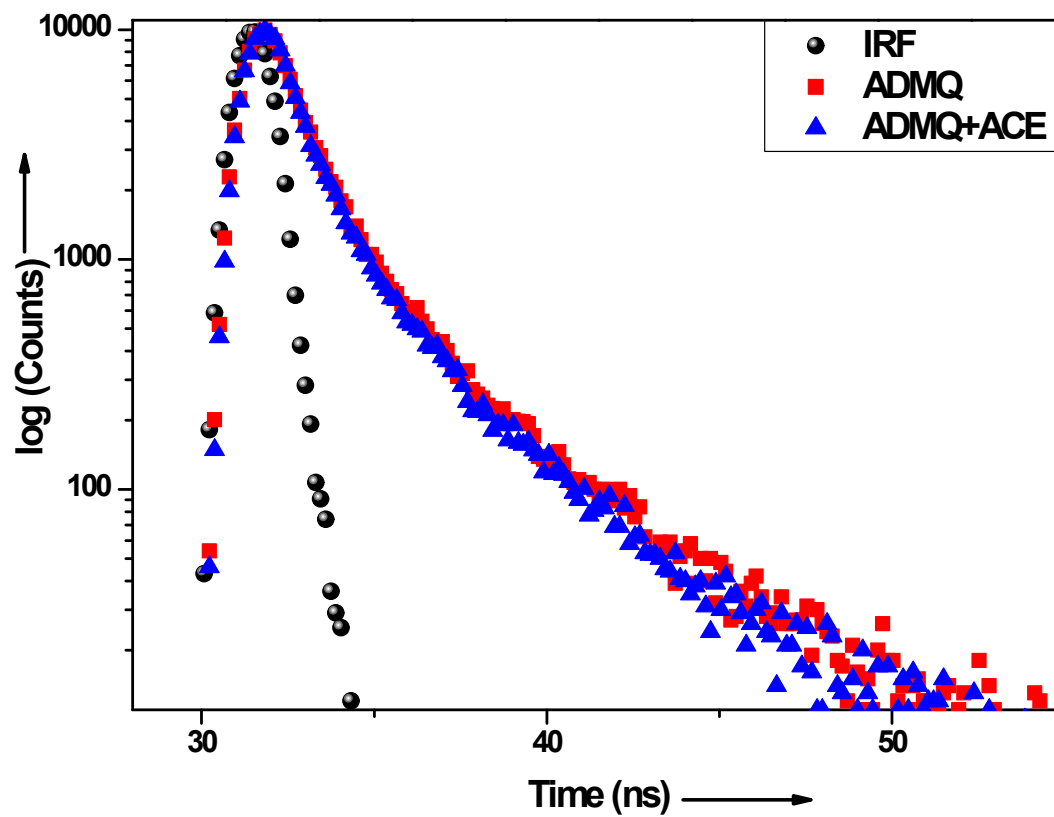

**S2-** Lifetime data of increasing ACE in ADMQ environment . ( $\lambda_{\text{ex}} = 407 \text{ nm}$ ,  $\lambda_{\text{em}} = 550 \text{ nm}$ ) at 298 K.  $[\text{ADMQ}] = 9.871 \times 10^{-6} \text{ mol dm}^{-3}$

| <b>[ACE] (<math>\mu\text{M}</math>)</b> | <b><math>\tau_1</math> (ns)</b> | <b><math>\tau_2</math> (ns)</b> | <b><math>\alpha_1</math></b> | <b><math>\alpha_2</math></b> | <b><math>\tau_m</math> (ns)</b> | <b><math>\chi^2</math></b> |
|-----------------------------------------|---------------------------------|---------------------------------|------------------------------|------------------------------|---------------------------------|----------------------------|
| 0                                       | 0.955                           | 3.89                            | 2.05                         | 0.122                        | 1.11                            | 1.06                       |
| 0.00088                                 | 0.929                           | 3.85                            | 2.17                         | 0.124                        | 1.08                            | 1.17                       |
| 0.00177                                 | 0.954                           | 3.94                            | 2.28                         | 0.113                        | 1.09                            | 1.13                       |
| 0.00265                                 | 0.917                           | 3.84                            | 1.87                         | 0.114                        | 1.08                            | 1.17                       |
| 0.00353                                 | 0.926                           | 3.85                            | 2.13                         | 0.113                        | 1.07                            | 1.11                       |
| 0.00441                                 | 0.873                           | 3.73                            | 2.08                         | 0.112                        | 1.01                            | 1.13                       |
| 0.00530                                 | 0.891                           | 3.68                            | 2.12                         | 0.124                        | 1.04                            | 1.18                       |
| 0.00618                                 | 0.909                           | 3.88                            | 1.99                         | 0.108                        | 1.06                            | 1.05                       |
| 0.00706                                 | 0.880                           | 3.72                            | 2.05                         | 0.120                        | 1.03                            | 1.19                       |
| 0.00794                                 | 0.895                           | 3.71                            | 2.15                         | 0.122                        | 1.04                            | 1.25                       |
| 0.00882                                 | 0.890                           | 3.75                            | 2.19                         | 0.116                        | 1.03                            | 1.11                       |
| 0.00970                                 | 0.849                           | 3.54                            | 2.23                         | 0.136                        | 1.00                            | 1.15                       |

S3- Time resolved fluorescence decay of BSA with increasing ADMQ along with the residuals plot. ( $\lambda_{\text{ex}}= 280 \text{ nm}$ ,  $\lambda_{\text{em}}= 340 \text{ nm}$ ) at 298 K.

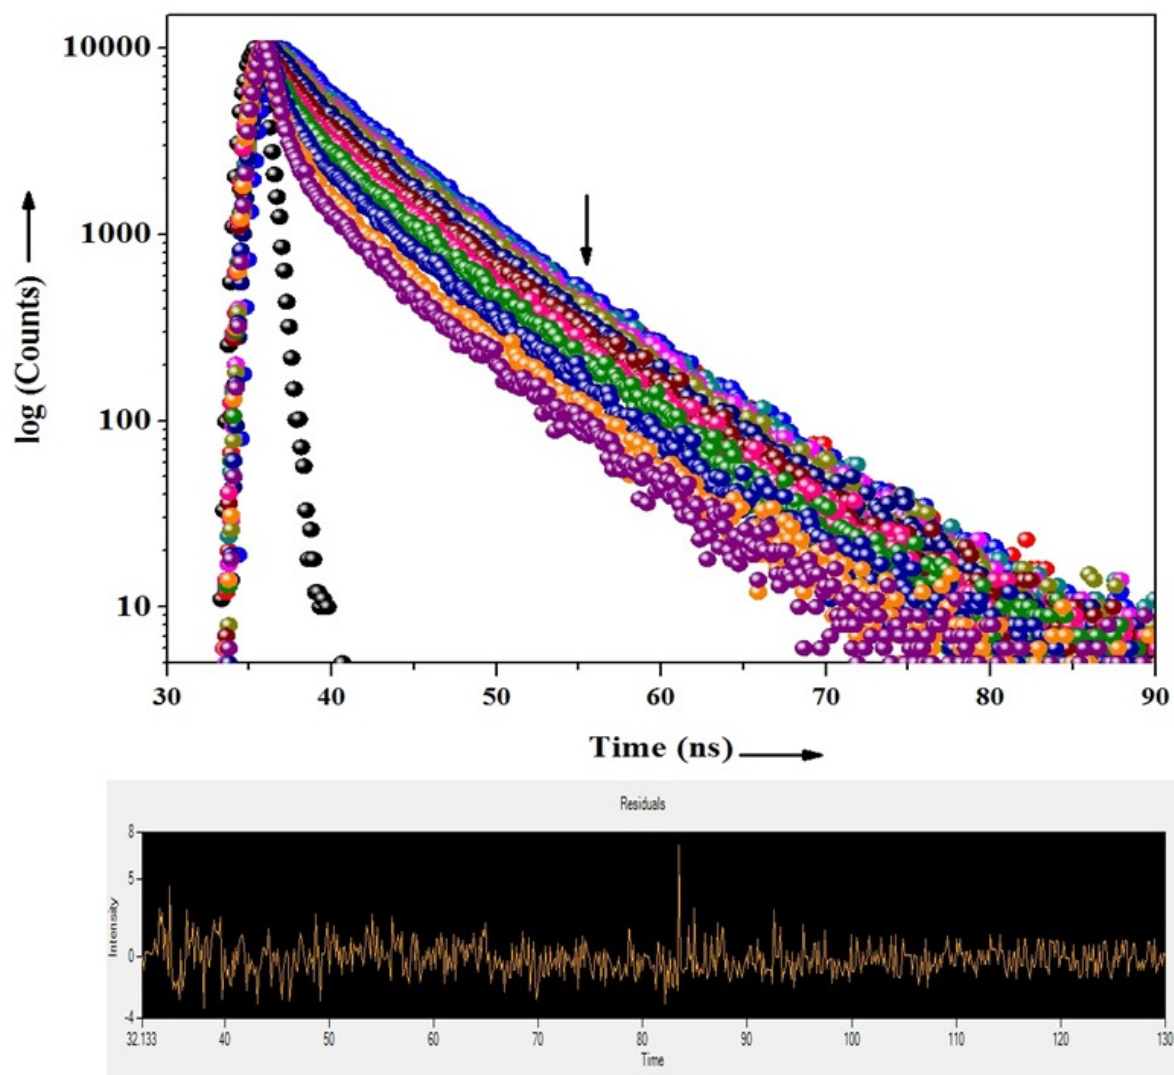

S4- Overlap spectra of normalized absorbance of ADMQ (blue) and normalized fluorescence intensity of BSA (black). The shaded region depicts the actual overlap of both species.

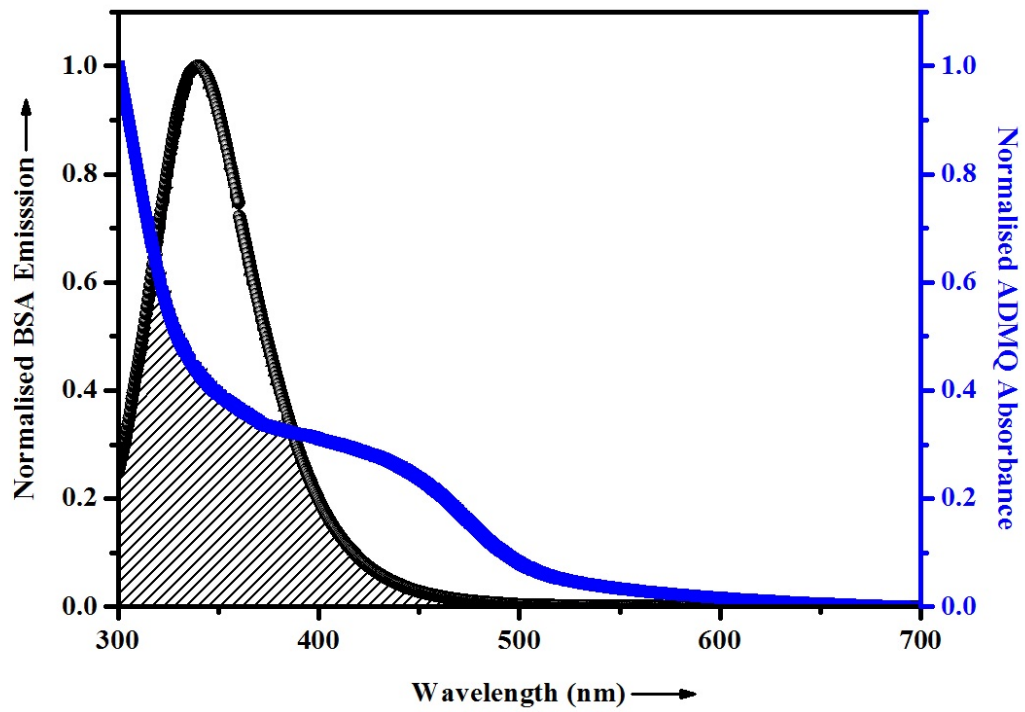

Supplement: c5ra08778c1.pdf [file c5ra08778c1.pdf]
